# Supplementary material for: Diagnostic potential of nanoparticle aided assays for MUC16 and MUC1 glycovariants in ovarian cancer
Source: PubMed Central journal article supplement — Int J Cancer. 2022 May 25;151(7):1175–84. doi: 10.1002/ijc.34111 (PMC9546485; doi:10.1002/ijc.34111), 2022-05-25
Supplement: IJC-151-1175-s001.pdf [file IJC-151-1175-s001.pdf]

## Supplementary Material

### Diagnostic potential of nanoparticle aided assays for MUC16 and MUC1 glycovariants in ovarian cancer

**Authors:** Shruti Jain, Nimrah Nadeem, Benjamin Ulfenborg, Maria Mäkelä, Shamima Afrin Ruma, Joonas Terävä, Kaisa Huhtinen, Janne Leivo, Björg Kristjansdottir, Kim Pettersson, Karin Sundfeldt, Kamlesh Gidwani

| S.No. | Table of Contents                                                               |
|-------|---------------------------------------------------------------------------------|
| 1     | Supplemental Table 1 – Data compilation of cyst fluid validation cohort (n=272) |
| 2     | Supplemental Table 2 – Data compilation of serum validation cohort (n=272)      |
| 3     | Supplemental Figure 1 – Calibration curves and precision profiles               |
| 4     | Supplemental Figure 2 – Day-to-day variation of controls of GV assays           |

| Subgroup             | Malignant           | Non-malignant        | Marker        | AUC                  | SN (%) at |        |        |        |               |               | 95% CI        | at 90-100% SP |        |               |
|----------------------|---------------------|----------------------|---------------|----------------------|-----------|--------|--------|--------|---------------|---------------|---------------|---------------|--------|---------------|
|                      |                     |                      |               |                      | 75% SP    | 90% SP | 95% SP | 97% SP | 98% SP        | 99% SP        |               | pAUC          | 95% CI |               |
| All patients         | 85<br>(67=M, 18=BL) | 187<br>(58=H, 129=B) | Single marker | CA125 IA             | 0.518     | 23.5   | 14.1   | 12.9   | 8.2           | 8.2           | 1.2           | 0.445 - 0.591 | 0.527  | 0.497 - 0.563 |
|                      |                     |                      |               | CA15-3 IA            | 0.677     | 48.2   | 31.8   | 25.9   | 17.6          | 14.1          | 11.8          | 0.606 - 0.748 | 0.598  | 0.552 - 0.651 |
|                      |                     |                      |               | MUC16 MGL            | 0.753     | 60     | 44.7   | 28.2   | 22.4          | 11.8          | 2.4           | 0.690 - 0.816 | 0.618  | 0.557 - 0.689 |
|                      |                     |                      |               | MUC16 STn            | 0.784     | 67.1   | 51.8   | 35.3   | 31.8          | 27.1          | 12.9          | 0.724 - 0.845 | 0.656  | 0.594 - 0.728 |
|                      |                     |                      |               | MUC1 STn             | 0.893     | 84.7   | 77.6   | 48.2   | 36.5          | 25.9          | 20            | 0.852 - 0.934 | 0.721  | 0.635 - 0.812 |
|                      |                     |                      |               | MUC1 Tn              | 0.904     | 85.9   | 74.1   | 63.5   | 61.2          | 51.8          | 29.4          | 0.864 - 0.944 | 0.789  | 0.721 - 0.858 |
|                      |                     |                      | Combination   | CA125 IA + CA15-3 IA | 0.709     | 61.2   | 35.3   | 25.9   | 21.2          | 18.8          | 12.9          | 0.640 - 0.778 | 0.608  | 0.558 - 0.665 |
|                      | MUC1 STn + MUC1 Tn  | 0.924                | 91.8          | 80.0                 | 70.6      | 58.8   | 54.1   | 18.8   | 0.889 - 0.959 | 0.799         | 0.728 - 0.870 |               |        |               |
| All patients         | 67                  | 187<br>(58=H, 129=B) | Single marker | CA125 IA             | 0.548     | 26.9   | 16.4   | 14.9   | 9.0           | 9             | 1.5           | 0.470 - 0.627 | 0.534  | 0.499 - 0.576 |
| Excluding borderline |                     |                      |               | CA15-3 IA            | 0.723     | 55.2   | 37.3   | 29.9   | 22.4          | 17.9          | 14.9          | 0.649 - 0.798 | 0.622  | 0.567 - 0.683 |
|                      |                     |                      |               | MUC16 MGL            | 0.763     | 64.2   | 47.8   | 32.8   | 25.4          | 11.9          | 3             | 0.693 - 0.833 | 0.633  | 0.566 - 0.709 |
|                      |                     |                      |               | MUC16 STn            | 0.830     | 76.1   | 62.7   | 44.8   | 40.3          | 34.3          | 16.4          | 0.769 - 0.891 | 0.701  | 0.628 - 0.778 |
|                      |                     |                      |               | MUC1 STn             | 0.896     | 85.1   | 80.6   | 52.2   | 38.8          | 29.9          | 25.4          | 0.851 - 0.941 | 0.739  | 0.651 - 0.833 |
|                      |                     |                      |               | MUC1 Tn              | 0.926     | 89.6   | 80.6   | 71.6   | 70.1          | 62.7          | 37.3          | 0.886 - 0.966 | 0.830  | 0.760 - 0.900 |
|                      |                     |                      | Combination   | CA125 IA + CA15-3 IA | 0.741     | 65.7   | 41.8   | 32.8   | 28.4          | 25.4          | 16.4          | 0.667 - 0.816 | 0.634  | 0.578 - 0.699 |
|                      |                     | MUC1 STn + MUC1 Tn   | 0.934         | 92.5                 | 83.6      | 77.6   | 71.6   | 68.7   | 23.9          | 0.897 - 0.971 | 0.835         | 0.763 - 0.903 |        |               |
| Postmenopausal       | 64<br>(54=M, 10=BL) | 144<br>(40=H, 104=B) | Single marker | CA125 IA             | 0.491     | 23.4   | 15.6   | 14.1   | 9.4           | 1.6           | 1.6           | 0.404 - 0.578 | NA     |               |
|                      |                     |                      |               | CA15-3 IA            | 0.682     | 46.9   | 34.4   | 26.6   | 17.2          | 14.1          | 12.5          | 0.601 - 0.764 | 0.600  | 0.546 - 0.662 |
|                      |                     |                      |               | MUC16 MGL            | 0.744     | 59.4   | 51.6   | 32.8   | 25.0          | 10.9          | 4.7           | 0.668 - 0.821 | 0.635  | 0.561 - 0.721 |
|                      |                     |                      |               | MUC16 STn            | 0.816     | 71.9   | 59.4   | 50.0   | 39.1          | 31.3          | 14.1          | 0.751 - 0.880 | 0.698  | 0.620 - 0.781 |
|                      |                     |                      |               | MUC1 STn             | 0.914     | 89.1   | 81.3   | 56.3   | 50.0          | 35.9          | 29.7          | 0.873 - 0.956 | 0.764  | 0.668 - 0.859 |
|                      |                     |                      |               | MUC1 Tn              | 0.927     | 90.6   | 82.8   | 75.0   | 68.8          | 67.2          | 64.1          | 0.884 - 0.969 | 0.851  | 0.783 - 0.915 |
|                      |                     |                      | Combination   | CA125 IA + CA15-3 IA | 0.732     | 64.1   | 40.6   | 28.1   | 23.4          | 18.8          | 12.5          | 0.656 - 0.809 | 0.613  | 0.557 - 0.683 |
|                      |                     | MUC1 STn + MUC1 Tn   | 0.942         | 92.2                 | 82.8      | 73.4   | 70.3   | 70.3   | 67.2          | 0.905 - 0.979 | 0.854         | 0.787 - 0.921 |        |               |
| Postmenopausal       | 54                  | 144<br>(40=H, 104=B) | Single marker | CA125 IA             | 0.508     | 25.9   | 16.7   | 14.8   | 9.3           | 1.9           | 1.9           | 0.416 - 0.601 | 0.532  | 0.495 - 0.581 |
| Excluding borderline |                     |                      |               | CA15-3 IA            | 0.715     | 50     | 37.0   | 29.6   | 20.4          | 16.7          | 14.8          | 0.632 - 0.798 | 0.612  | 0.554 - 0.679 |
|                      |                     |                      |               | MUC16 MGL            | 0.756     | 63     | 53.7   | 37.0   | 27.8          | 11.1          | 5.6           | 0.674 - 0.839 | 0.649  | 0.569 - 0.736 |

|                      |               |               |               |                      |       |      |      |      |      |      |      |               |       |               |
|----------------------|---------------|---------------|---------------|----------------------|-------|------|------|------|------|------|------|---------------|-------|---------------|
|                      |               |               |               | MUC16 STn            | 0.846 | 77.8 | 68.5 | 59.3 | 46.3 | 37   | 16.7 | 0.779 - 0.913 | 0.737 | 0.651 - 0.826 |
|                      |               |               |               | MUC1 STn             | 0.918 | 90.7 | 85.2 | 59.3 | 51.9 | 37   | 31.5 | 0.873 - 0.963 | 0.776 | 0.675 - 0.875 |
|                      |               |               |               | MUC1 Tn              | 0.944 | 92.6 | 88.9 | 81.5 | 75.9 | 75.9 | 72.2 | 0.903 - 0.986 | 0.887 | 0.821 - 0.945 |
|                      |               |               | Combination   | CA125 IA + CA15-3 IA | 0.751 | 68.5 | 40.7 | 29.6 | 25.9 | 22.2 | 14.8 | 0.672 - 0.831 | 0.624 | 0.560 - 0.699 |
|                      |               |               |               | MUC1 STn + MUC1 Tn   | 0.945 | 92.6 | 87.0 | 79.6 | 79.6 | 79.6 | 75.9 | 0.904 - 0.987 | 0.888 | 0.823 - 0.948 |
| Early stage EOC      | 56            | 187           | Single marker | CA125 IA             | 0.482 | 17.9 | 8.9  | 8.9  | 7.1  | 7.1  | 0    | 0.399 - 0.564 | NA    |               |
|                      | (38=M, 18=BL) | (58=H, 129=B) |               | CA15-3 IA            | 0.647 | 48.2 | 32.1 | 25.0 | 16.1 | 12.5 | 12.5 | 0.558 - 0.736 | 0.596 | 0.542 - 0.659 |
|                      |               |               |               | MUC16 MGL            | 0.751 | 58.9 | 41.1 | 21.4 | 16.1 | 10.7 | 0    | 0.680 - 0.821 | 0.594 | 0.532 - 0.670 |
|                      |               |               |               | MUC16 STn            | 0.754 | 60.7 | 44.6 | 28.6 | 26.8 | 23.2 | 10.7 | 0.680 - 0.828 | 0.631 | 0.565 - 0.703 |
|                      |               |               |               | MUC1 STn             | 0.909 | 87.5 | 76.8 | 48.2 | 39.3 | 25   | 16.1 | 0.870 - 0.947 | 0.721 | 0.631 - 0.816 |
|                      |               |               |               | MUC1 Tn              | 0.891 | 83.9 | 71.4 | 58.9 | 57.1 | 46.4 | 23.2 | 0.842 - 0.940 | 0.767 | 0.692 - 0.845 |
|                      |               |               | Combination   | CA125 IA + CA15-3 IA | 0.711 | 53.6 | 39.3 | 30.4 | 25.0 | 21.4 | 12.5 | 0.631 - 0.790 | 0.625 | 0.566 - 0.692 |
|                      |               |               |               | MUC1 STn + MUC1 Tn   | 0.920 | 91.1 | 76.8 | 64.3 | 55.4 | 48.2 | 16.1 | 0.881 - 0.959 | 0.780 | 0.703 - 0.861 |
| Early stage EOC      | 38            | 187           | Single marker | CA125 IA             | 0.519 | 21.1 | 10.5 | 10.5 | 7.9  | 7.9  | 0    | 0.424 - 0.614 | 0.516 | 0.482 - 0.563 |
| Excluding borderline |               | (58=H, 129=B) |               | CA15-3 IA            | 0.714 | 60.5 | 42.1 | 31.6 | 23.7 | 18.4 | 18.4 | 0.611 - 0.816 | 0.638 | 0.565 - 0.720 |
|                      |               |               |               | MUC16 MGL            | 0.767 | 65.8 | 44.7 | 26.3 | 18.4 | 10.5 | 0    | 0.684 - 0.850 | 0.610 | 0.538 - 0.696 |
|                      |               |               |               | MUC16 STn            | 0.819 | 73.7 | 60.5 | 42.1 | 39.5 | 34.2 | 15.8 | 0.739 - 0.900 | 0.697 | 0.616 - 0.784 |
|                      |               |               |               | MUC1 STn             | 0.922 | 89.5 | 81.6 | 55.3 | 44.7 | 31.6 | 23.7 | 0.882 - 0.962 | 0.753 | 0.656 - 0.853 |
|                      |               |               |               | MUC1 Tn              | 0.925 | 89.5 | 81.6 | 71.1 | 71.1 | 63.2 | 34.2 | 0.876 - 0.974 | 0.828 | 0.745 - 0.908 |
|                      |               |               | Combination   | CA125 IA + CA15-3 IA | 0.775 | 68.4 | 50.0 | 42.1 | 31.6 | 31.6 | 21.1 | 0.685 - 0.865 | 0.672 | 0.597 - 0.757 |
|                      |               |               |               | MUC1 STn + MUC1 Tn   | 0.935 | 92.1 | 84.2 | 73.7 | 68.4 | 65.8 | 23.7 | 0.893 - 0.977 | 0.826 | 0.745 - 0.907 |

### Supplemental Table 1 – Data compilation of cyst fluid validation cohort (n=272).

Data information: Area under the curve (AUC) along with 95% confidence interval (CI) and sensitivity (SN) at 75, 90, 95, 97, 98 and 99% specificity (SP) is reported. Corrected partial AUC (pAUC) and 95% CI is reported for SP 90-100%. 'NA' is the partial AUC correction not defined for ROC curves below the diagonal. Abbreviations: M, Malignant; BL, Borderline; H, Healthy; B, Benign.

| Subgroup             | Malignant            | Non-malignant        | Marker        | AUC         | SN (%) at         |        |        |               |               |               | at 90-100% SP |               |               |               |
|----------------------|----------------------|----------------------|---------------|-------------|-------------------|--------|--------|---------------|---------------|---------------|---------------|---------------|---------------|---------------|
|                      |                      |                      |               |             | 75% SP            | 90% SP | 95% SP | 97% SP        | 98% SP        | 99% SP        | 95% CI        | pAUC          | 95% CI        |               |
| All patients         | 85<br>(67=M, 18=BL)  | 187<br>(58=H, 129=B) | Single marker | CA125 IA    | 0.805             | 74.1   | 52.9   | 48.2          | 30.6          | 18.8          | 2.4           | 0.746 - 0.864 | 0.668         | 0.603 - 0.740 |
|                      |                      |                      |               | CA15-3 IA   | 0.721             | 52.9   | 45.9   | 38.8          | 38.8          | 30.6          | 0.651 - 0.791 | 0.677         | 0.623 - 0.733 |               |
|                      |                      |                      |               | HE4 IA      | 0.747             | 65.9   | 47.1   | 38.8          | 32.9          | 18.8          | 0.679 - 0.815 | 0.666         | 0.610 - 0.726 |               |
|                      |                      |                      |               | MUC16 MGL   | 0.813             | 72.9   | 57.6   | 47.1          | 36.5          | 23.5          | 0.754 - 0.872 | 0.694         | 0.634 - 0.767 |               |
|                      |                      |                      |               | MUC16 STn   | 0.811             | 75.3   | 63.5   | 57.6          | 45.9          | 22.4          | 0.748 - 0.874 | 0.743         | 0.675 - 0.810 |               |
|                      |                      |                      |               | MUC1 STn    | 0.816             | 68.2   | 57.6   | 57.6          | 49.4          | 21.2          | 0.756 - 0.875 | 0.741         | 0.679 - 0.803 |               |
|                      |                      |                      |               | Combination | CA125 IA + HE4 IA | 0.753  | 64.7   | 49.4          | 36.5          | 31.8          | 28.2          | 21.2          | 0.686 - 0.820 | 0.664         |
|                      | MUC16 STn + MUC1 STn | 0.837                | 74.1          | 62.4        | 57.6              | 54.1   | 45.9   | 22.4          | 0.781 - 0.893 | 0.739         | 0.676 - 0.801 |               |               |               |
| All patients         | 67                   | 187                  | Single marker | CA125 IA    | 0.848             | 80.6   | 65.7   | 59.7          | 38.8          | 23.9          | 3             | 0.789 - 0.908 | 0.715         | 0.636 - 0.797 |
| Excluding borderline |                      | (58=H, 129=B)        |               | CA15-3 IA   | 0.792             | 65.7   | 58.2   | 49.3          | 49.3          | 49.3          | 38.8          | 0.722 - 0.862 | 0.732         | 0.672 - 0.797 |
|                      |                      |                      |               | HE4 IA      | 0.818             | 76.1   | 58.2   | 47.8          | 40.3          | 23.9          | 0.752 - 0.884 | 0.711         | 0.646 - 0.779 |               |
|                      |                      |                      |               | MUC16 MGL   | 0.856             | 80.6   | 70.1   | 58.2          | 46.3          | 29.9          | 0.798 - 0.915 | 0.748         | 0.675 - 0.824 |               |
|                      |                      |                      |               | MUC16 STn   | 0.883             | 86.6   | 74.6   | 73.1          | 58.2          | 28.4          | 0.826 - 0.939 | 0.804         | 0.727 - 0.875 |               |
|                      |                      |                      |               | MUC1 STn    | 0.872             | 76.1   | 70.1   | 70.1          | 61.2          | 26.9          | 0.818 - 0.927 | 0.798         | 0.728 - 0.865 |               |
|                      |                      |                      |               | Combination | CA125 IA + HE4 IA | 0.825  | 76.1   | 61.2          | 44.8          | 38.8          | 26.9          | 0.761 - 0.890 | 0.709         | 0.640 - 0.781 |
|                      | MUC16 STn + MUC1 STn | 0.896                | 80.6          | 73.1        | 70.1              | 67.2   | 28.4   | 0.850 - 0.942 | 0.803         | 0.732 - 0.871 |               |               |               |               |
| Postmenopausal       | 64<br>(54=M, 10=BL)  | 144<br>(40=H, 104=B) | Single marker | CA125 IA    | 0.810             | 75     | 59.4   | 50.0          | 20.3          | 14.1          | 3.1           | 0.742 - 0.878 | 0.674         | 0.588 - 0.771 |
|                      |                      |                      |               | CA15-3 IA   | 0.754             | 57.8   | 50.0   | 45.3          | 45.3          | 34.4          | 0.676 - 0.832 | 0.702         | 0.638 - 0.770 |               |
|                      |                      |                      |               | HE4 IA      | 0.788             | 68.8   | 48.4   | 40.6          | 37.5          | 29.7          | 0.719 - 0.858 | 0.675         | 0.613 - 0.744 |               |
|                      |                      |                      |               | MUC16 MGL   | 0.831             | 73.4   | 70.3   | 50.0          | 42.2          | 26.6          | 0.764 - 0.898 | 0.720         | 0.639 - 0.809 |               |
|                      |                      |                      |               | MUC16 STn   | 0.842             | 79.7   | 67.2   | 57.8          | 51.6          | 26.6          | 0.775 - 0.909 | 0.756         | 0.674 - 0.833 |               |
|                      |                      |                      |               | MUC1 STn    | 0.869             | 76.6   | 76.6   | 64.1          | 64.1          | 25            | 0.811 - 0.928 | 0.789         | 0.712 - 0.863 |               |
|                      |                      |                      |               | Combination | CA125 IA + HE4 IA | 0.792  | 70.3   | 50.0          | 39.1          | 34.4          | 28.1          | 0.723 - 0.861 | 0.670         | 0.607 - 0.743 |
|                      | MUC16 STn + MUC1 STn | 0.886                | 87.5          | 68.8        | 65.6              | 62.5   | 28.1   | 0.833 - 0.940 | 0.787         | 0.707 - 0.863 |               |               |               |               |
| Postmenopausal       | 54                   | 144                  | Single marker | CA125 IA    | 0.849             | 81.5   | 68.5   | 57.4          | 24.1          | 16.7          | 3.7           | 0.783 - 0.916 | 0.706         | 0.606 - 0.811 |
| Excluding borderline |                      | (40=H, 104=B)        |               | CA15-3 IA   | 0.794             | 66.7   | 59.3   | 53.7          | 53.7          | 44.4          | 40.7          | 0.715 - 0.874 | 0.745         | 0.676 - 0.817 |
|                      |                      |                      |               | HE4 IA      | 0.833             | 75.9   | 55.6   | 46.3          | 42.6          | 35.2          | 0.766 - 0.901 | 0.704         | 0.635 - 0.783 |               |

|                                         |               |               |               |                      |       |      |      |      |      |      |      |               |       |               |
|-----------------------------------------|---------------|---------------|---------------|----------------------|-------|------|------|------|------|------|------|---------------|-------|---------------|
|                                         |               |               |               | MUC16 MGL            | 0.865 | 79.6 | 75.9 | 57.4 | 50.0 | 40.7 | 31.5 | 0.801 - 0.929 | 0.758 | 0.668 - 0.848 |
|                                         |               |               |               | MUC16 STn            | 0.889 | 87   | 75.9 | 68.5 | 61.1 | 57.4 | 31.5 | 0.828 - 0.950 | 0.801 | 0.714 - 0.882 |
|                                         |               |               |               | MUC1 STn             | 0.899 | 79.6 | 79.6 | 74.1 | 74.1 | 70.4 | 29.6 | 0.844 - 0.953 | 0.828 | 0.748 - 0.902 |
|                                         |               |               | Combination   | CA125 IA + HE4 IA    | 0.839 | 77.8 | 61.1 | 44.4 | 40.7 | 37   | 33.3 | 0.773 - 0.905 | 0.699 | 0.629 - 0.781 |
|                                         |               |               |               | MUC16 STn + MUC1 STn | 0.918 | 90.7 | 75.9 | 75.9 | 72.2 | 72.2 | 33.3 | 0.873 - 0.963 | 0.828 | 0.743 - 0.902 |
| Premenopausal                           | 21            | 43            | Single marker | CA125 IA             | 0.764 | 71.4 | 33.3 | 23.8 | 23.8 | 23.8 | 23.8 | 0.643 - 0.885 | 0.614 | 0.524 - 0.732 |
|                                         | (13=M, 8=BL)  | (18=H, 25=B)  |               | CA15-3 IA            | 0.612 | 38.1 | 28.6 | 23.8 | 19.0 | 19   | 19   | 0.462 - 0.763 | 0.592 | 0.507 - 0.698 |
|                                         |               |               |               | HE4 IA               | 0.637 | 47.6 | 33.3 | 33.3 | 33.3 | 9.5  | 9.5  | 0.481 - 0.794 | 0.620 | 0.524 - 0.747 |
|                                         |               |               |               | MUC16 MGL            | 0.725 | 66.7 | 28.6 | 28.6 | 28.6 | 28.6 | 23.8 | 0.590 - 0.860 | 0.621 | 0.526 - 0.738 |
|                                         |               |               |               | MUC16 STn            | 0.712 | 61.9 | 52.4 | 42.9 | 42.9 | 42.9 | 42.9 | 0.559 - 0.865 | 0.721 | 0.610 - 0.834 |
|                                         |               |               |               | MUC1 STn             | 0.602 | 42.9 | 38.1 | 19.0 | 19.0 | 19   | 19   | 0.442 - 0.762 | 0.598 | 0.506 - 0.721 |
|                                         |               |               | Combination   | CA125 IA + HE4 IA    | 0.753 | 61.9 | 33.3 | 28.6 | 23.8 | 23.8 | 23.8 | 0.630 - 0.876 | 0.620 | 0.526 - 0.729 |
|                                         |               |               |               | MUC16 STn + MUC1 STn | 0.769 | 61.9 | 52.4 | 42.9 | 42.9 | 42.9 | 42.9 | 0.636 - 0.901 | 0.720 | 0.609 - 0.834 |
| Early stage EOC                         | 56            | 187           | Single marker | CA125 IA             | 0.723 | 60.7 | 33.9 | 26.8 | 16.1 | 10.7 | 0    | 0.646 - 0.801 | 0.584 | 0.533 - 0.652 |
|                                         | (38=M, 18=BL) | (58=H, 129=B) |               | CA15-3 IA            | 0.639 | 39.3 | 32.1 | 25.0 | 25.0 | 25   | 19.6 | 0.551 - 0.727 | 0.604 | 0.549 - 0.667 |
|                                         |               |               |               | HE4 IA               | 0.649 | 53.6 | 30.4 | 21.4 | 16.1 | 12.5 | 7.1  | 0.561 - 0.737 | 0.578 | 0.527 - 0.638 |
|                                         |               |               |               | MUC16 MGL            | 0.732 | 58.9 | 39.3 | 28.6 | 21.4 | 16.1 | 12.5 | 0.653 - 0.811 | 0.605 | 0.548 - 0.681 |
|                                         |               |               |               | MUC16 STn            | 0.736 | 64.3 | 48.2 | 41.1 | 32.1 | 28.6 | 12.5 | 0.651 - 0.820 | 0.667 | 0.599 - 0.741 |
|                                         |               |               |               | MUC1 STn             | 0.753 | 57.1 | 44.6 | 44.6 | 37.5 | 32.1 | 12.5 | 0.674 - 0.832 | 0.679 | 0.611 - 0.751 |
|                                         |               |               | Combination   | CA125 IA + HE4 IA    | 0.658 | 51.8 | 32.1 | 19.6 | 12.5 | 8.9  | 7.1  | 0.571 - 0.744 | 0.578 | 0.524 - 0.640 |
|                                         |               |               |               | MUC16 STn + MUC1 STn | 0.771 | 60.7 | 48.2 | 44.6 | 41.1 | 32.1 | 10.7 | 0.695 - 0.847 | 0.680 | 0.613 - 0.752 |
| Early stage EOC<br>Excluding borderline | 38            | 187           | Single marker | CA125 IA             | 0.761 | 65.8 | 47.4 | 36.8 | 23.7 | 15.8 | 0    | 0.670 - 0.852 | 0.627 | 0.558 - 0.714 |
|                                         |               | (58=H, 129=B) |               | CA15-3 IA            | 0.725 | 55.3 | 47.4 | 36.8 | 36.8 | 36.8 | 28.9 | 0.625 - 0.825 | 0.666 | 0.591 - 0.748 |
|                                         |               |               |               | HE4 IA               | 0.727 | 65.8 | 42.1 | 28.9 | 21.1 | 15.8 | 10.5 | 0.628 - 0.826 | 0.616 | 0.548 - 0.695 |
|                                         |               |               |               | MUC16 MGL            | 0.769 | 65.8 | 52.6 | 39.5 | 31.6 | 23.7 | 18.4 | 0.679 - 0.859 | 0.657 | 0.582 - 0.746 |
|                                         |               |               |               | MUC16 STn            | 0.825 | 78.9 | 60.5 | 60.5 | 47.4 | 42.1 | 18.4 | 0.739 - 0.912 | 0.739 | 0.657 - 0.824 |
|                                         |               |               |               | MUC1 STn             | 0.823 | 65.8 | 60.5 | 60.5 | 52.6 | 44.7 | 18.4 | 0.743 - 0.904 | 0.749 | 0.665 - 0.834 |
|                                         |               |               | Combination   | CA125 IA + HE4 IA    | 0.738 | 65.8 | 44.7 | 26.3 | 15.8 | 13.2 | 10.5 | 0.641 - 0.836 | 0.617 | 0.542 - 0.699 |
|                                         |               |               |               | MUC16 STn + MUC1 STn | 0.843 | 65.8 | 60.5 | 60.5 | 57.9 | 44.7 | 15.8 | 0.771 - 0.915 | 0.750 | 0.668 - 0.835 |

|                         |              |               |               |                      |       |      |      |      |      |      |      |               |       |               |
|-------------------------|--------------|---------------|---------------|----------------------|-------|------|------|------|------|------|------|---------------|-------|---------------|
| Early stage EOC         | 29           | 144           | Single marker | CA125 IA             | 0.752 | 65.5 | 48.3 | 34.5 | 13.8 | 10.3 | 0    | 0.646 - 0.858 | 0.619 | 0.539 - 0.722 |
| Excluding borderline    |              | (40=H, 104=B) |               | CA15-3 IA            | 0.702 | 51.7 | 44.8 | 41.4 | 41.4 | 31   | 31   | 0.579 - 0.824 | 0.679 | 0.592 - 0.775 |
| Excluding premenopausal |              |               |               | HE4 IA               | 0.745 | 62.1 | 37.9 | 24.1 | 20.7 | 13.8 | 10.3 | 0.641 - 0.848 | 0.591 | 0.520 - 0.682 |
|                         |              |               |               | MUC16 MGL            | 0.773 | 62.1 | 58.6 | 37.9 | 31.0 | 20.7 | 17.2 | 0.669 - 0.876 | 0.662 | 0.573 - 0.768 |
|                         |              |               |               | MUC16 STn            | 0.834 | 79.3 | 62.1 | 55.2 | 48.3 | 44.8 | 20.7 | 0.737 - 0.930 | 0.736 | 0.639 - 0.840 |
|                         |              |               |               | MUC1 STn             | 0.849 | 69   | 69.0 | 62.1 | 62.1 | 58.6 | 20.7 | 0.763 - 0.935 | 0.770 | 0.674 - 0.867 |
|                         |              |               | Combination   | CA125 IA + HE4 IA    | 0.754 | 69   | 44.8 | 24.1 | 17.2 | 10.3 | 10.3 | 0.652 - 0.856 | 0.586 | 0.516 - 0.683 |
|                         |              |               |               | MUC16 STn + MUC1 STn | 0.868 | 82.8 | 62.1 | 62.1 | 62.1 | 58.6 | 20.7 | 0.794 - 0.943 | 0.765 | 0.668 - 0.863 |
| Late stage EOC          | 29           | 187           | Single marker | CA125 IA             | 0.963 | 100  | 89.7 | 89.7 | 58.6 | 34.5 | 6.9  | 0.938 - 0.987 | 0.830 | 0.723 - 0.925 |
|                         | (29=M, 0=BL) | (58=H, 129=B) |               | CA15-3 IA            | 0.880 | 79.3 | 72.4 | 65.5 | 65.5 | 65.5 | 51.7 | 0.804 - 0.955 | 0.818 | 0.727 - 0.902 |
|                         |              |               |               | HE4 IA               | 0.936 | 89.7 | 79.3 | 72.4 | 65.5 | 65.5 | 41.4 | 0.892 - 0.979 | 0.834 | 0.747 - 0.916 |
|                         |              |               |               | MUC16 MGL            | 0.970 | 100  | 93.1 | 82.8 | 65.5 | 62.1 | 44.8 | 0.949 - 0.992 | 0.866 | 0.776 - 0.945 |
|                         |              |               |               | MUC16 STn            | 0.958 | 96.6 | 93.1 | 89.7 | 72.4 | 69   | 41.4 | 0.911 - 1.000 | 0.889 | 0.801 - 0.961 |
|                         |              |               |               | MUC1 STn             | 0.937 | 89.7 | 82.8 | 82.8 | 72.4 | 69   | 37.9 | 0.883 - 0.990 | 0.861 | 0.773 - 0.937 |
|                         |              |               | Combination   | CA125 IA + HE4 IA    | 0.943 | 89.7 | 82.8 | 69.0 | 65.5 | 65.5 | 48.3 | 0.905 - 0.982 | 0.835 | 0.745 - 0.916 |
|                         |              |               |               | MUC16 STn + MUC1 STn | 0.977 | 100  | 96.6 | 79.3 | 72.4 | 69   | 41.4 | 0.960 - 0.994 | 0.882 | 0.789 - 0.956 |

**Supplemental Table 2 – Data compilation of serum validation cohort (n=272).**

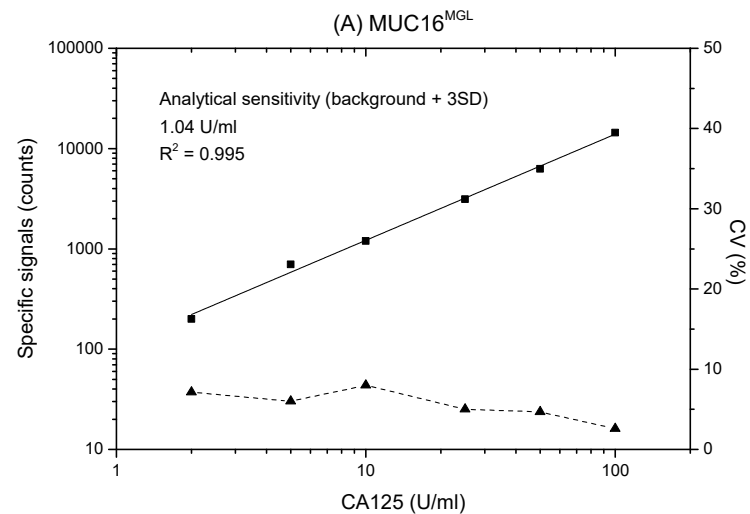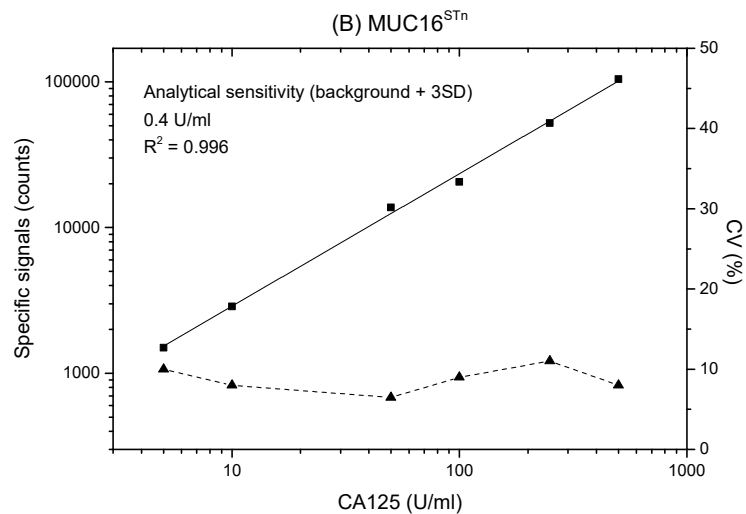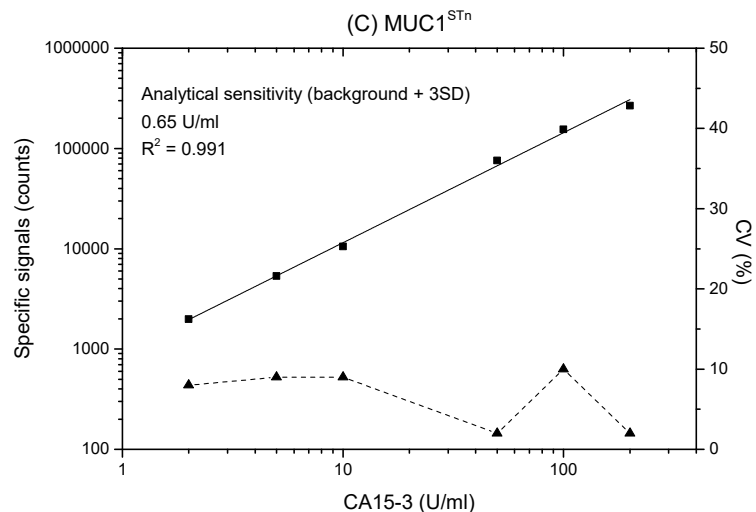

**Supplemental Figure 1. Calibration curves (solid line) and precision profiles (dashed line) of (A) MUC16<sup>MGL</sup>, (B) MUC16<sup>STn</sup> and (C) MUC1<sup>STn</sup> GV assay from cyst fluid and serum cohorts.**

(A) MUC16<sup>MGL</sup>: Control-1

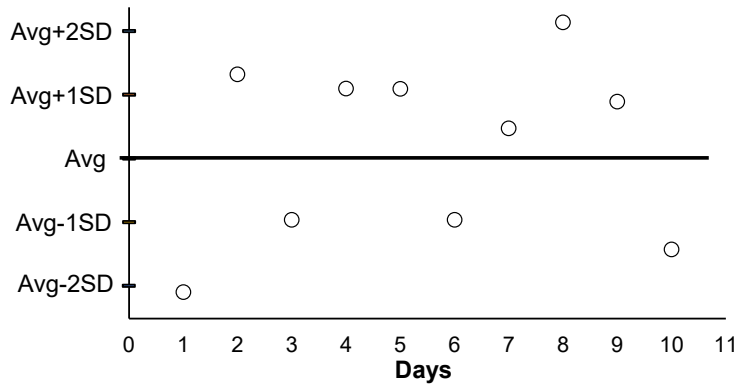

(B) MUC16<sup>MGL</sup>: Control-2

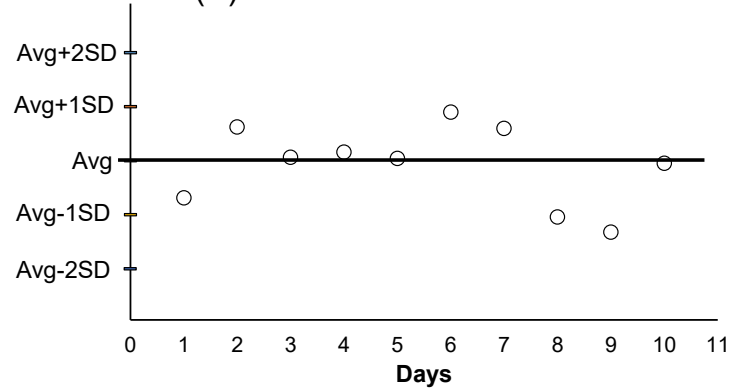

(C) MUC16<sup>STn</sup>: Control-1

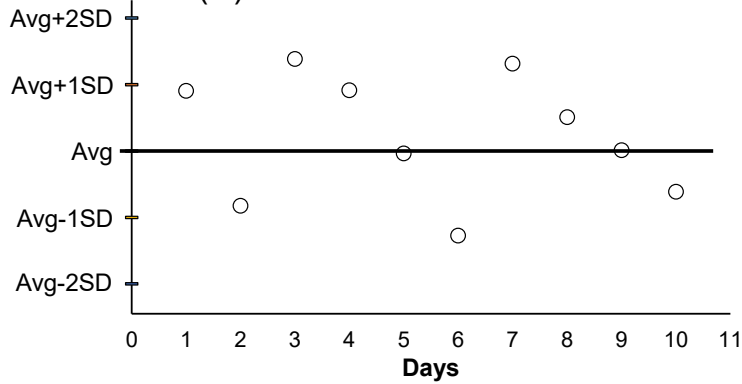

(D) MUC16<sup>STn</sup>: Control-2

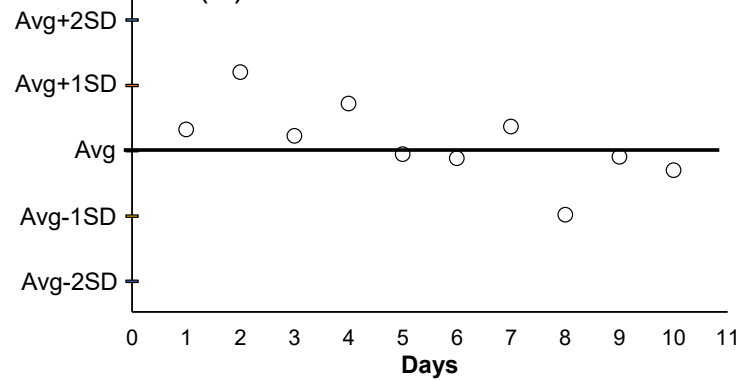

(E) MUC1<sup>STn</sup>: Control-1

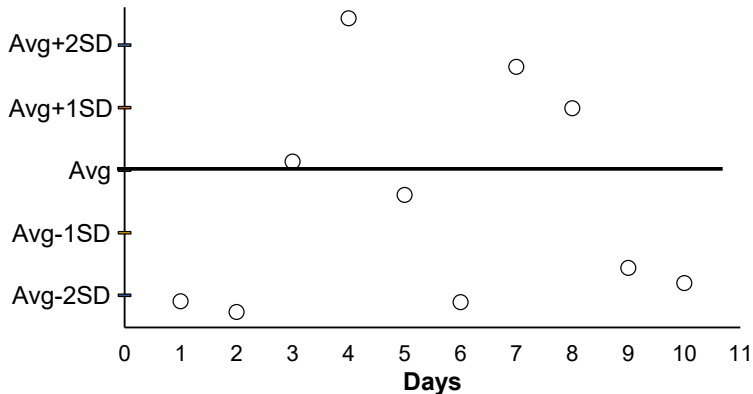

(F) MUC1<sup>STn</sup>: Control-2

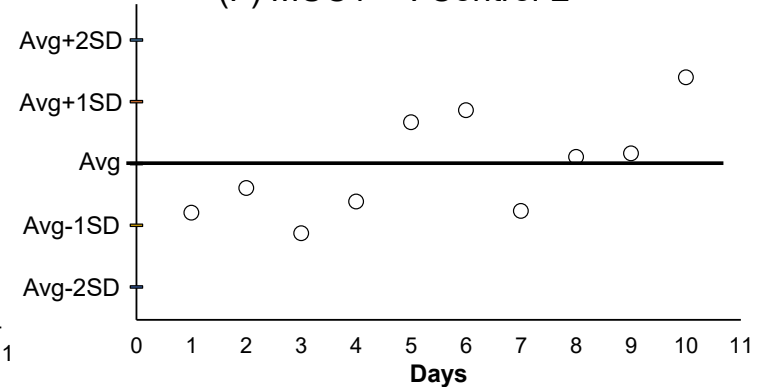

**Supplemental Figure 2. Day-to-day variation of 2 controls (high & low) of the three GV assays. (A, B) MUC16<sup>MGL</sup> (C, D) MUC16<sup>STn</sup> (E, F) MUC1<sup>STn</sup>. Variation is seen to be within 2 standard deviations (SD) of the average (Avg).**
